# Supplementary material for: Facile synthesis of antimalarial 1,2-disubstituted 4-quinolones from 1,3-bisaryl-monothio-1,3-diketones
Source: Royal Society of Chemistry journal article supplement (doi:10.1039/c4ob01455c), 2014-08-28
Supplement: c4ob01455c1.pdf [file c4ob01455c1.pdf]

Supporting information

## Facile Synthesis of Antimalarial 1,2-Disubstituted 4-Quinolones from 1,3-Bisaryl-monothio-1,3-diketones

Ajjampura C. Vinayaka,<sup>a</sup> Maralinganadoddi P. Sadashiva,<sup>\*,a,b</sup> Xianzhu Wu,<sup>b</sup> Sergei Biryukov,<sup>c</sup> Jose' A. Stoute,<sup>c</sup> Kanchugarakoppal S. Rangappa,<sup>a</sup> D. Channe Gowda<sup>\*,b</sup>

<sup>a</sup>Department of Studies in Chemistry, University of Mysore, Manasagangothri, Mysore 570006, India

<sup>b</sup>Department of Biochemistry and Molecular Biology, <sup>c</sup>Department of Microbiology and Immunology, Pennsylvania State University College of Medicine, Hershey, PA 17033, USA

[gowda@psu.edu](mailto:gowda@psu.edu); [mpsadashiva@gmail.com](mailto:mpsadashiva@gmail.com)

### <sup>1</sup>H and <sup>13</sup>C NMR Spectrum.

Figure S1 <sup>1</sup>H and <sup>13</sup>C NMR spectra of 3-(*NN*-dimethylamino) phenyl-3-[(4-chlorobenzyl) amino]-1-(2,5-dichlorophenyl) prop-2-en-1-one

Figure S2 <sup>1</sup>H and <sup>13</sup>C NMR spectra of 1-(2-chlorophenyl)-3-[(4-methoxyphenyl) amino]-3-(4-methylphenyl) prop-2-en-1-one

Figure S3 <sup>1</sup>H and <sup>13</sup>C NMR spectra of compound **4a**

Figure S4 <sup>1</sup>H and <sup>13</sup>C NMR spectra of compound **4b**

Figure S5 <sup>1</sup>H and <sup>13</sup>C NMR spectra of compound **4c**

Figure S6 <sup>1</sup>H and <sup>13</sup>C NMR spectra of compound **4d**

Figure S7 <sup>1</sup>H and <sup>13</sup>C NMR spectra of compound **4e**

Figure S8 <sup>1</sup>H and <sup>13</sup>C NMR spectra of compound **4f**

Figure S9 <sup>1</sup>H and <sup>13</sup>C NMR spectra of compound **4g**

Figure S10 <sup>1</sup>H and <sup>13</sup>C NMR spectra of compound **4h**

Figure S11 <sup>1</sup>H and <sup>13</sup>C NMR spectra of compound **4i**

Figure S12 <sup>1</sup>H and <sup>13</sup>C NMR spectra of compound **4j**

Figure S13 <sup>1</sup>H and <sup>13</sup>C NMR spectra of compound **4k**

Figure S14 <sup>1</sup>H and <sup>13</sup>C NMR spectra of compound **4l**

Figure S15 <sup>1</sup>H and <sup>13</sup>C NMR spectra of compound **4m**

Figure S16 <sup>1</sup>H and <sup>13</sup>C NMR spectra of compound **4n**

Figure S17 <sup>1</sup>H and <sup>13</sup>C NMR spectra of compound **4o**

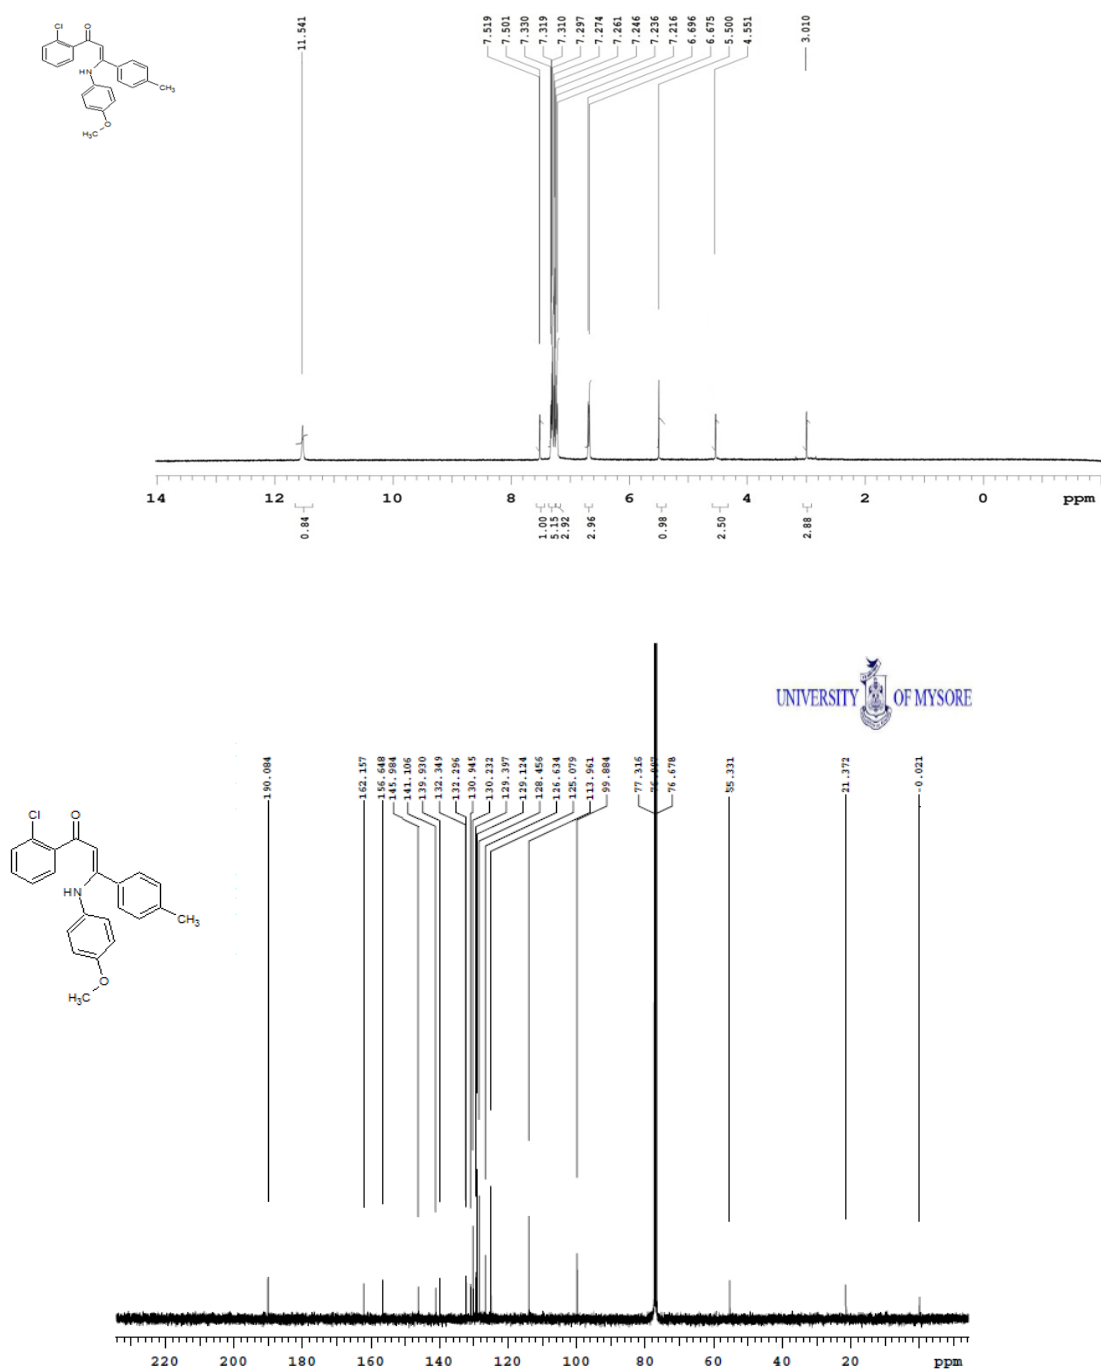

**Figure S1.** <sup>1</sup>H NMR and <sup>13</sup>C NMR spectra of 1-(2-chlorophenyl)-3-[(4-methoxyphenyl)amino]-3-(4-methylphenyl)prop-2-en-1-one

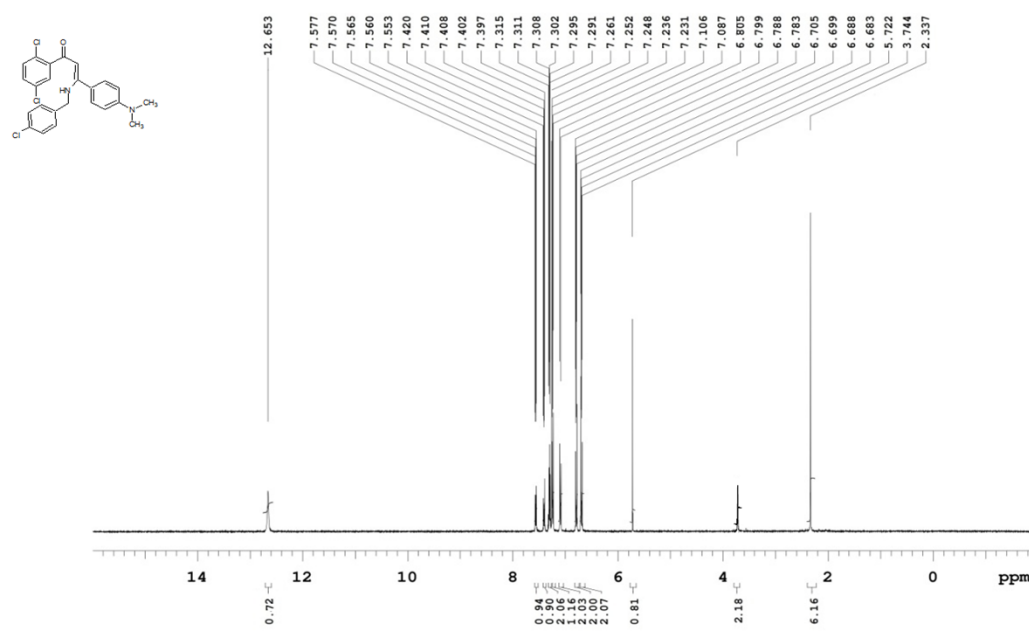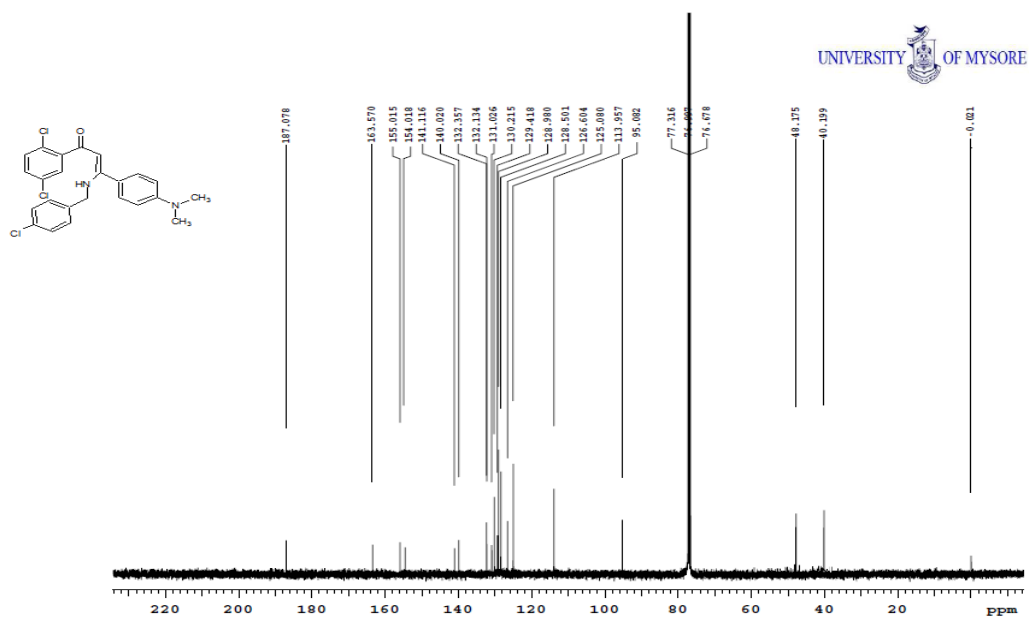

**Figure S2.** <sup>1</sup>H and <sup>13</sup>C NMR spectra of 3-(*N,N*-dimethylamino)phenyl-3-[(4-chlorobenzyl)amino]-1-(2,5-dichlorophenyl)prop-2-en-1-one

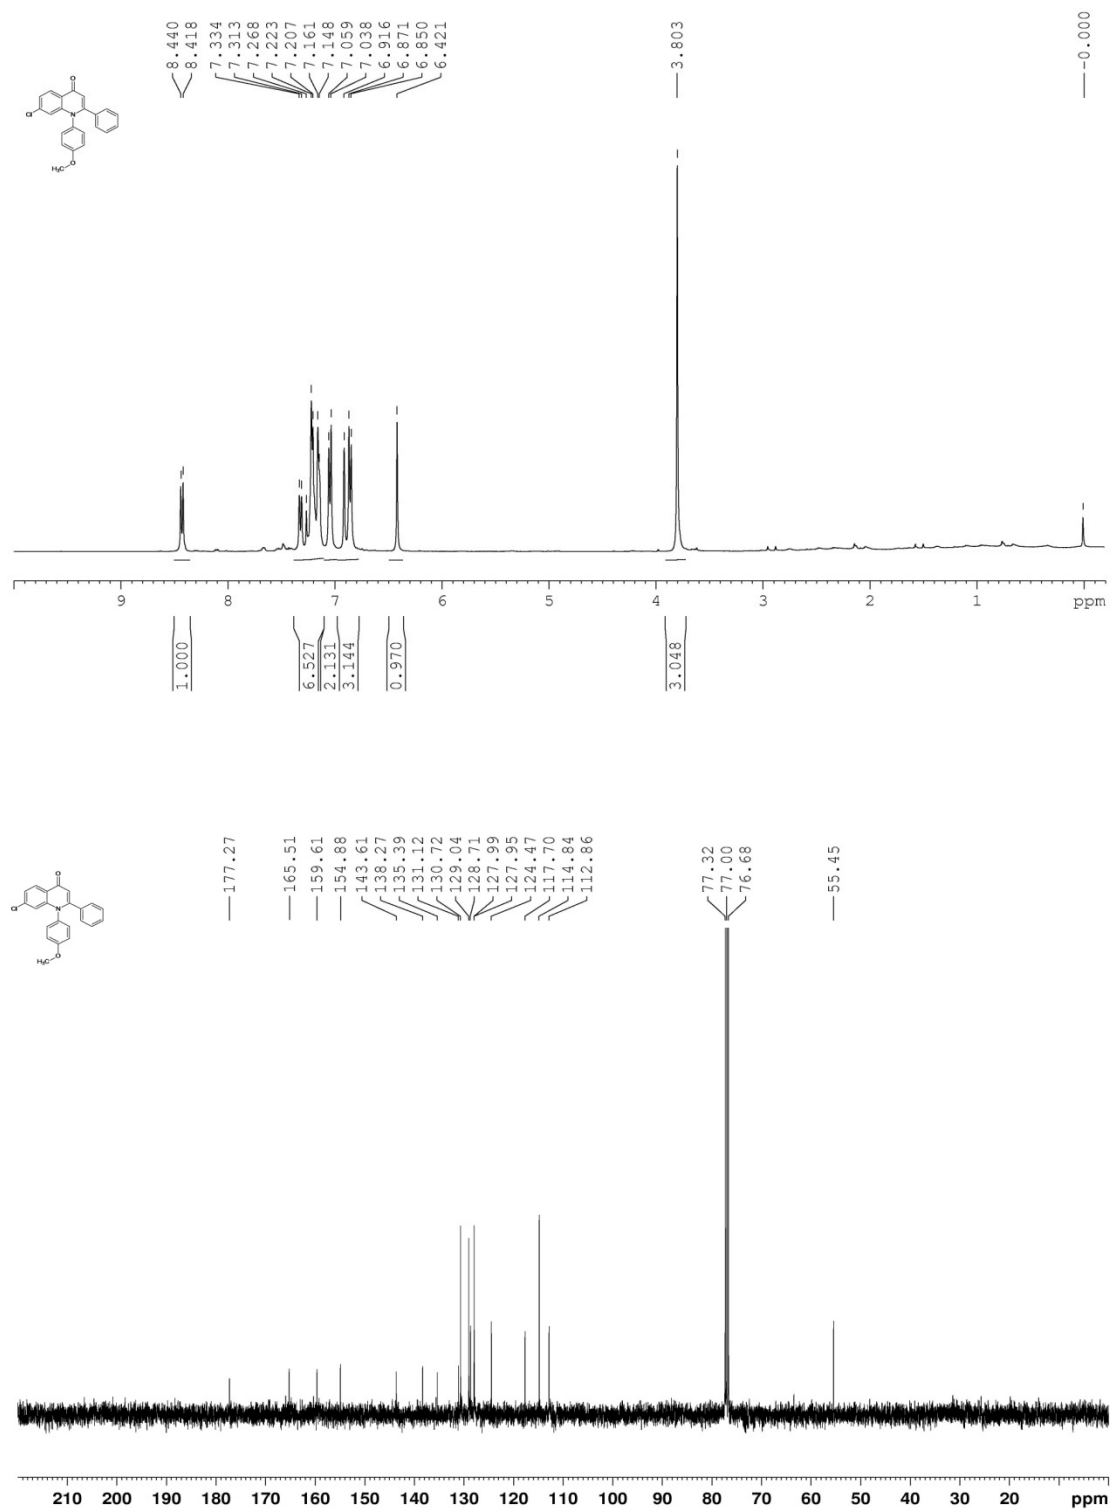

**Figure S3.** <sup>1</sup>H and <sup>13</sup>C NMR spectra of compound **4a**

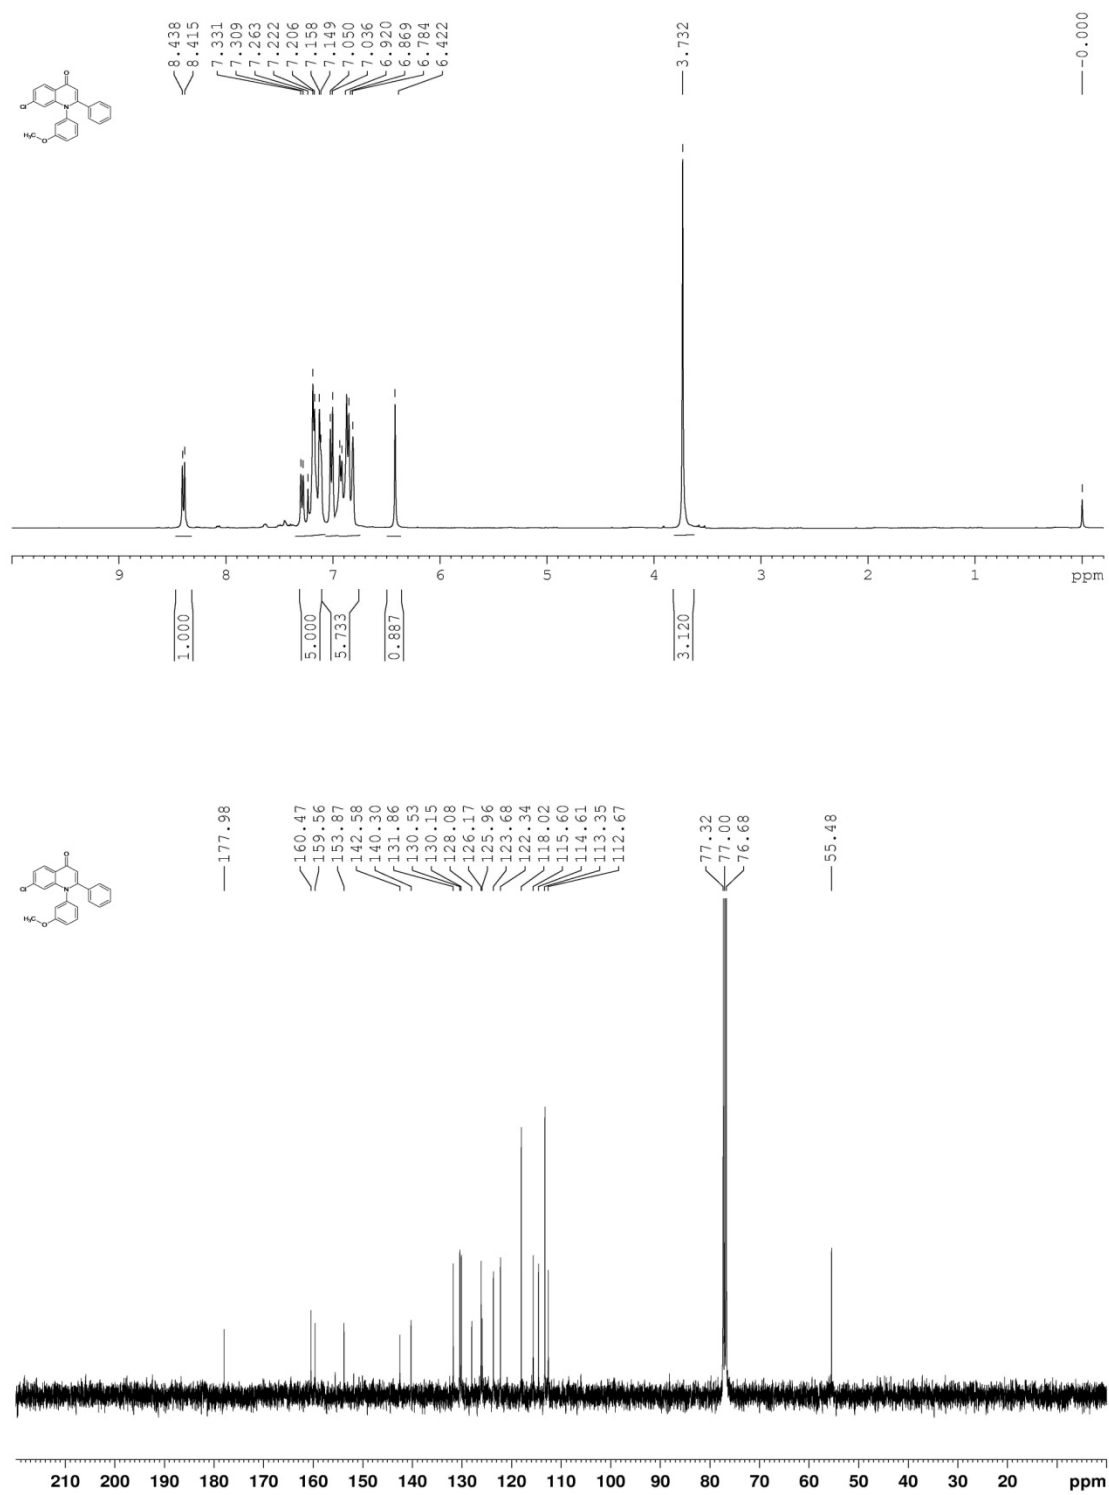

**Figure S4.** <sup>1</sup>H and <sup>13</sup>C NMR spectra of compound **4b**

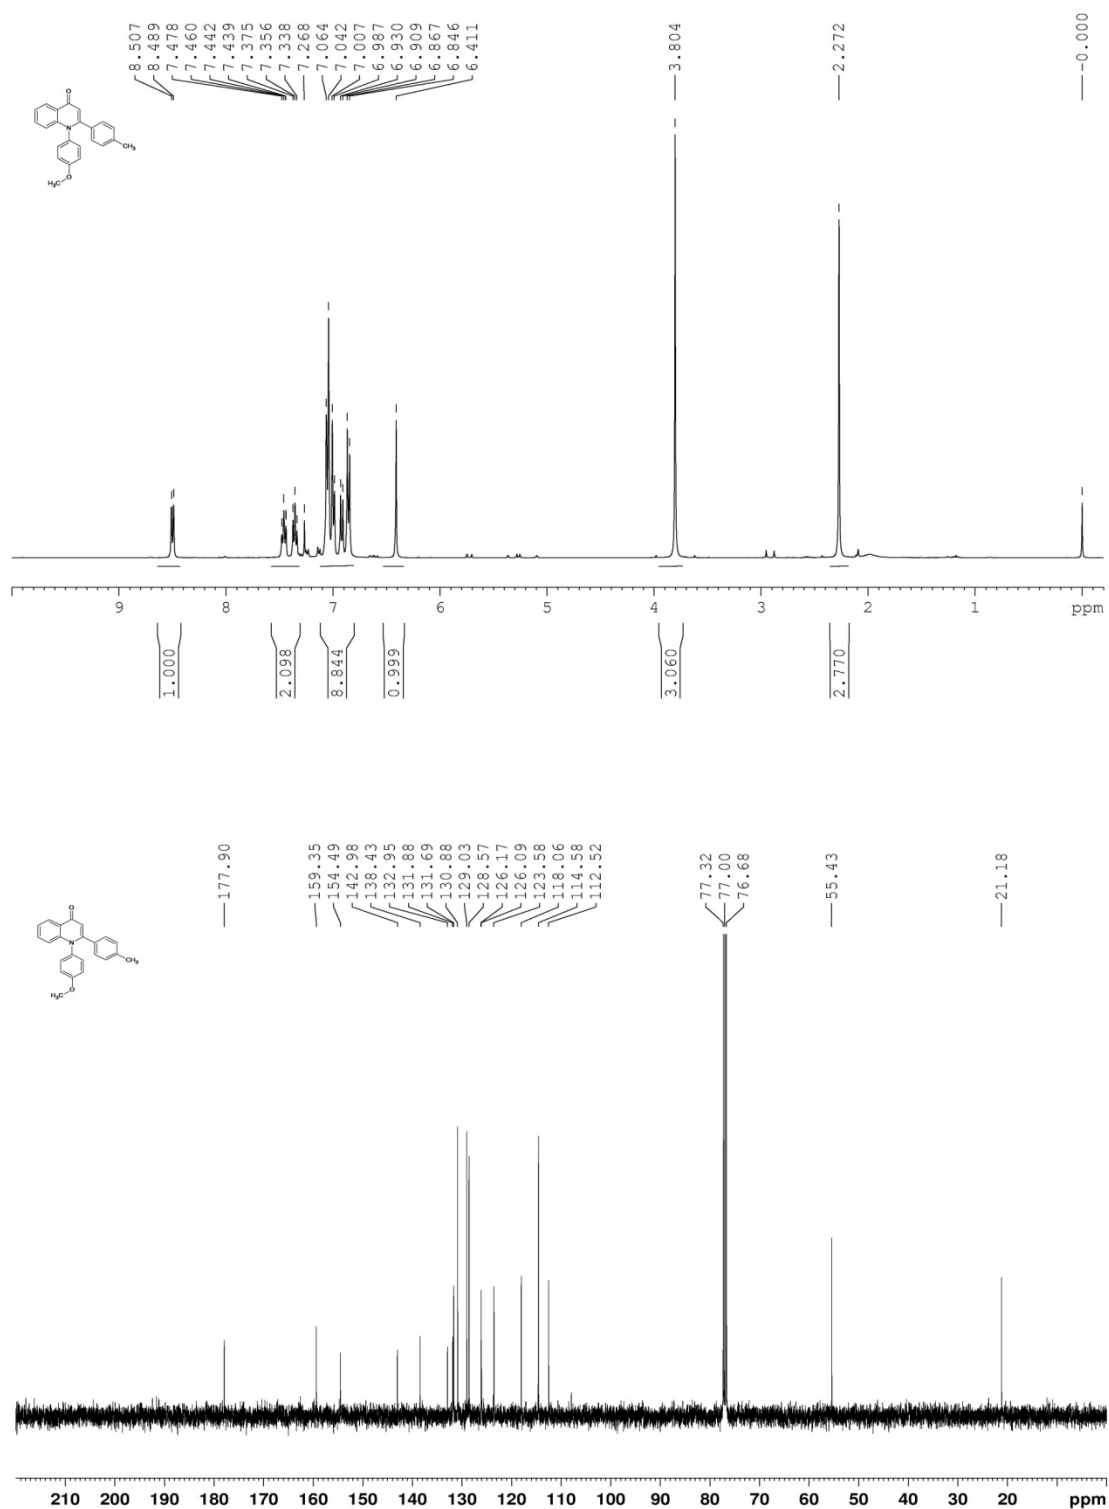

Figure S5. <sup>1</sup>H and <sup>13</sup>C NMR spectra of compound 4c

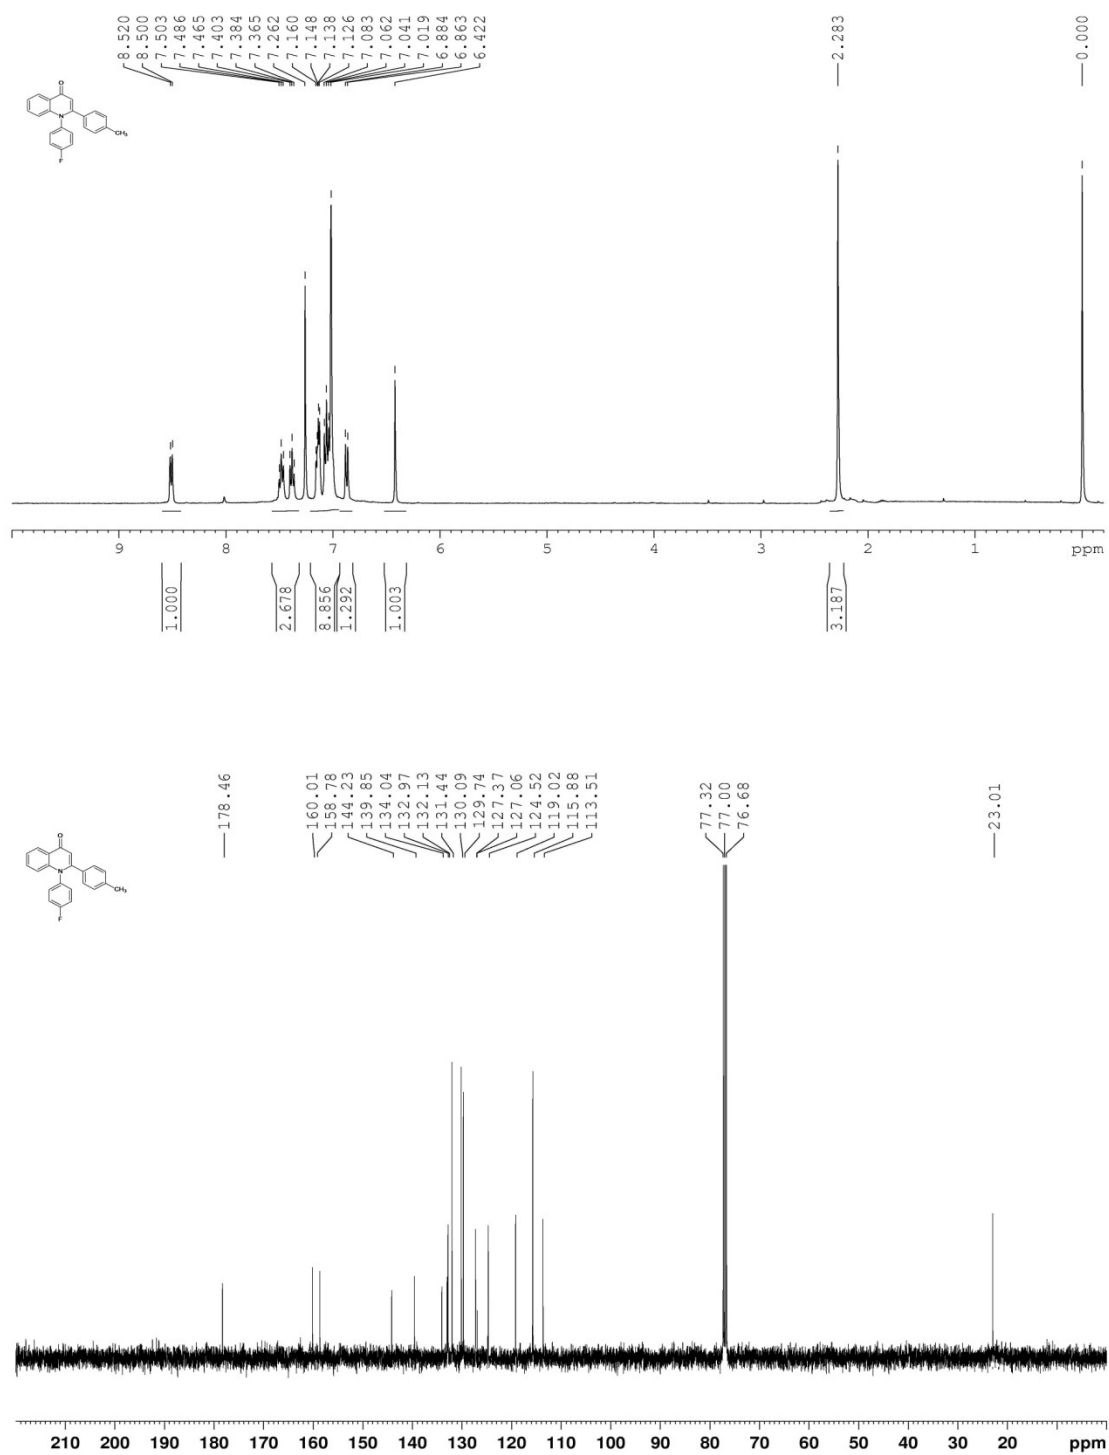

Figure S6. <sup>1</sup>H and <sup>13</sup>C NMR spectra of compound **4d**

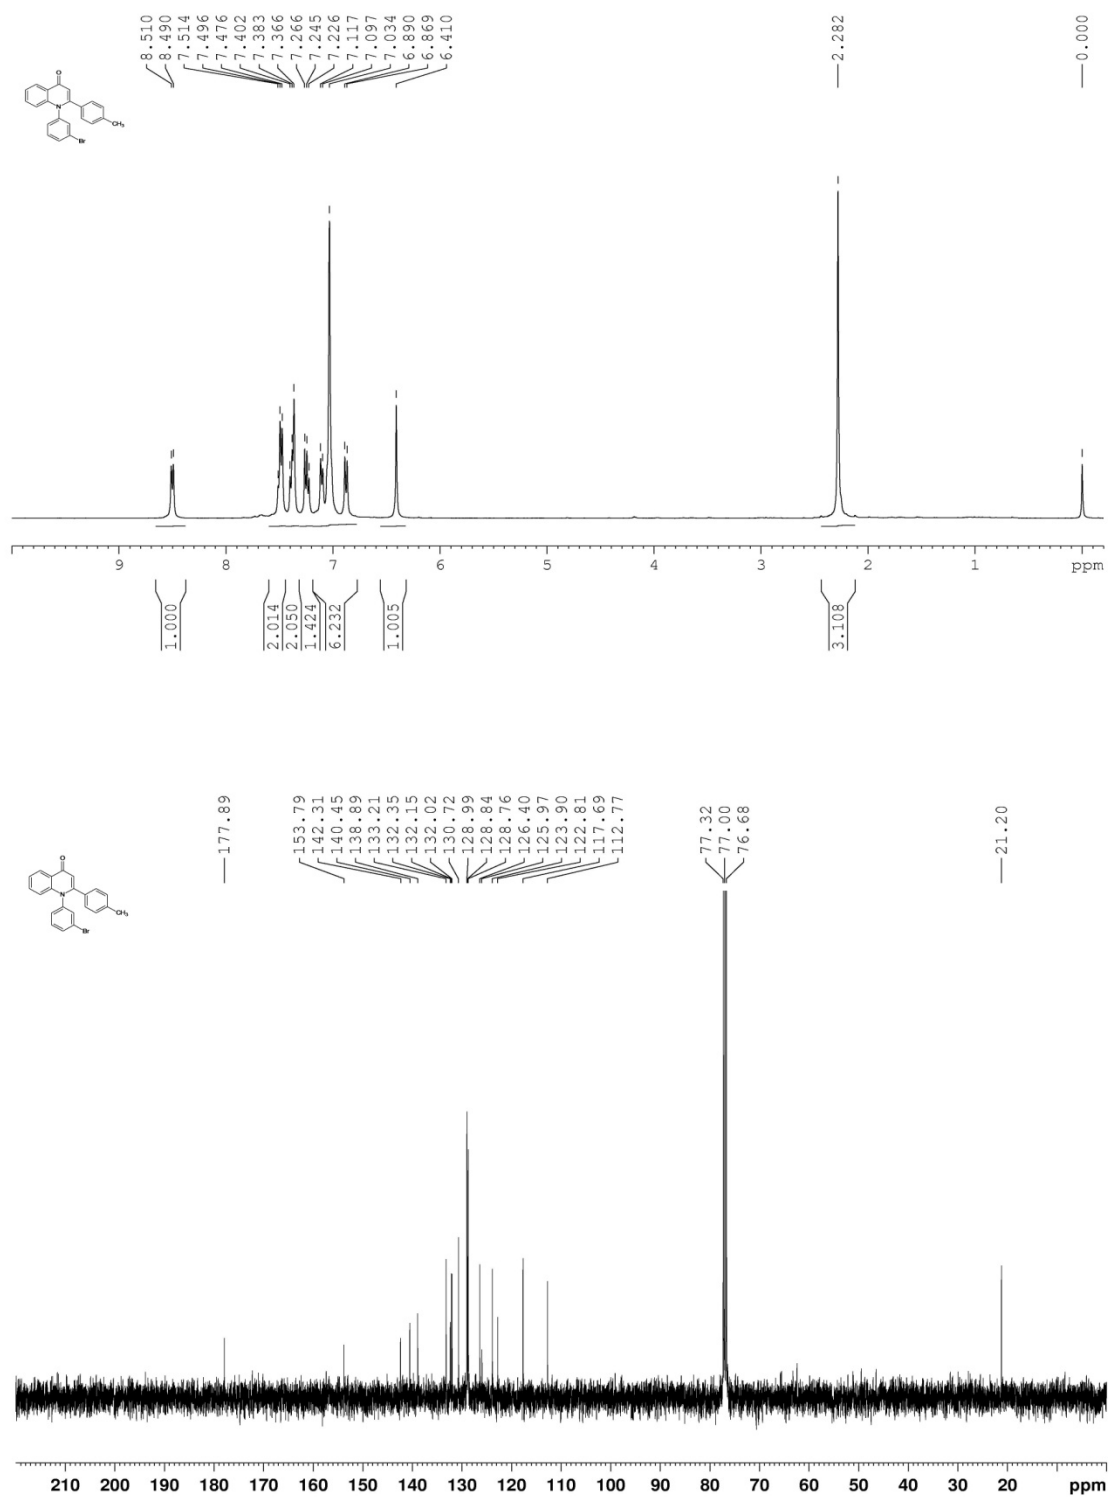

Figure S7. <sup>1</sup>H and <sup>13</sup>C NMR spectra of compound **4e**



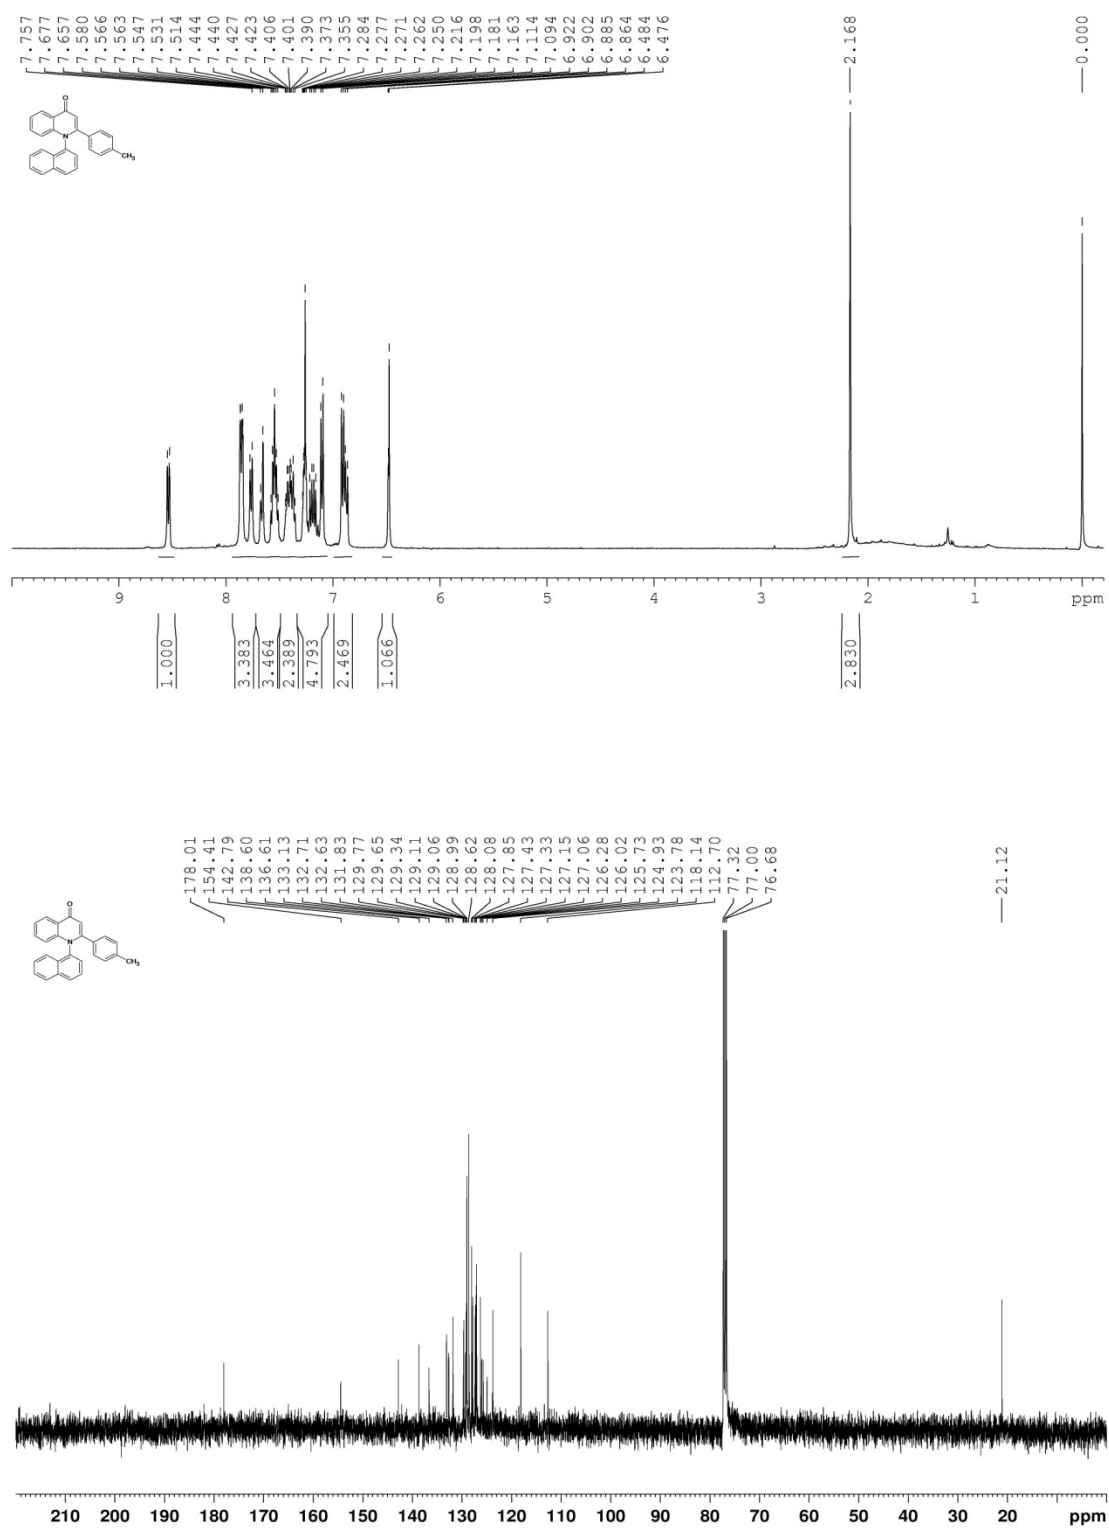

**Figure S8.** <sup>1</sup>H and <sup>13</sup>C NMR spectra of compound **4f**

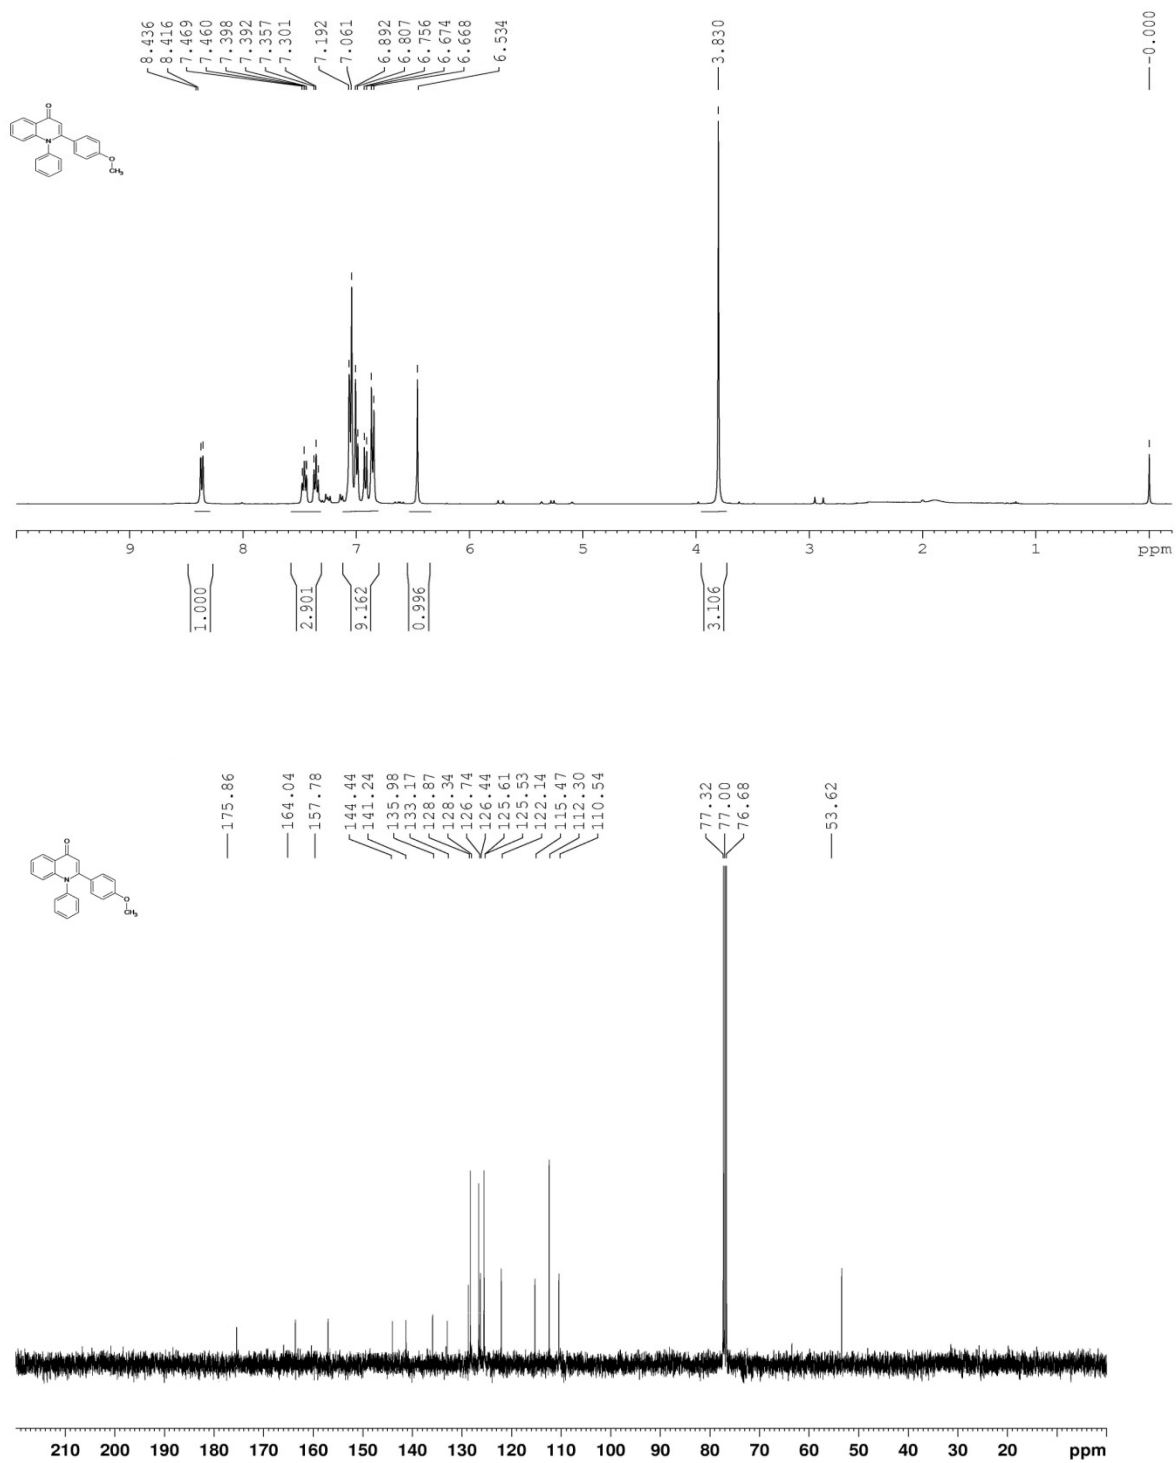

**Figure S9.** <sup>1</sup>H and <sup>13</sup>C NMR spectra of compound **4g**

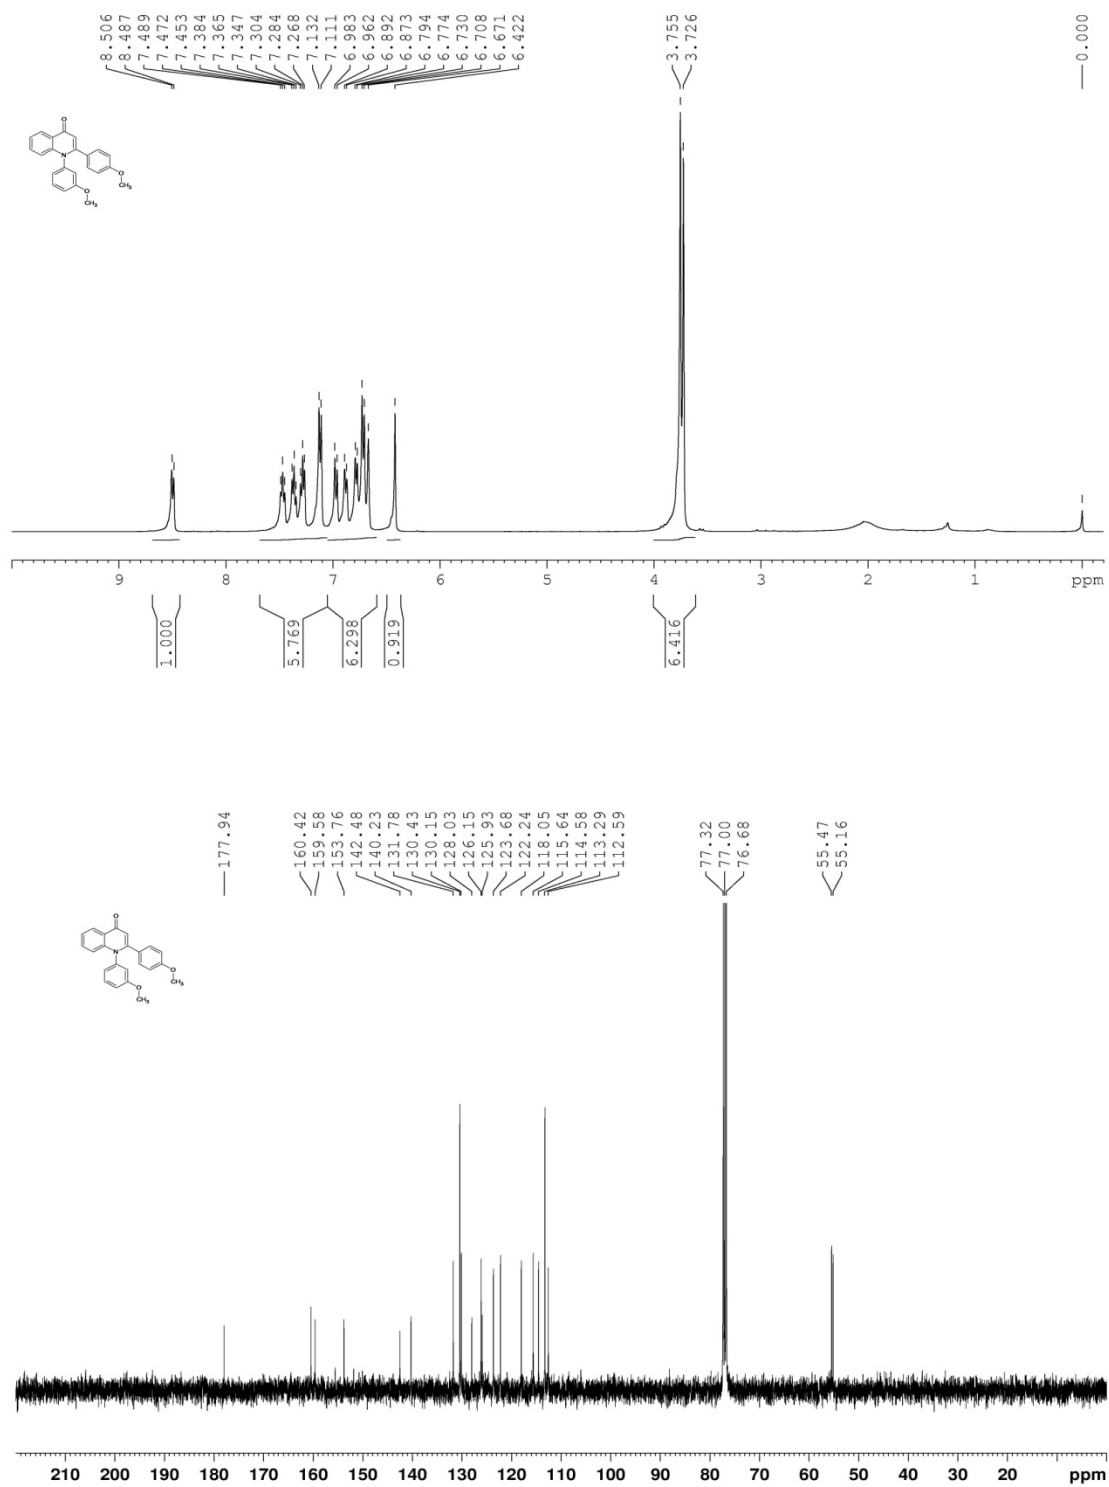

Figure S10. <sup>1</sup>H and <sup>13</sup>C NMR spectra of compound 4h

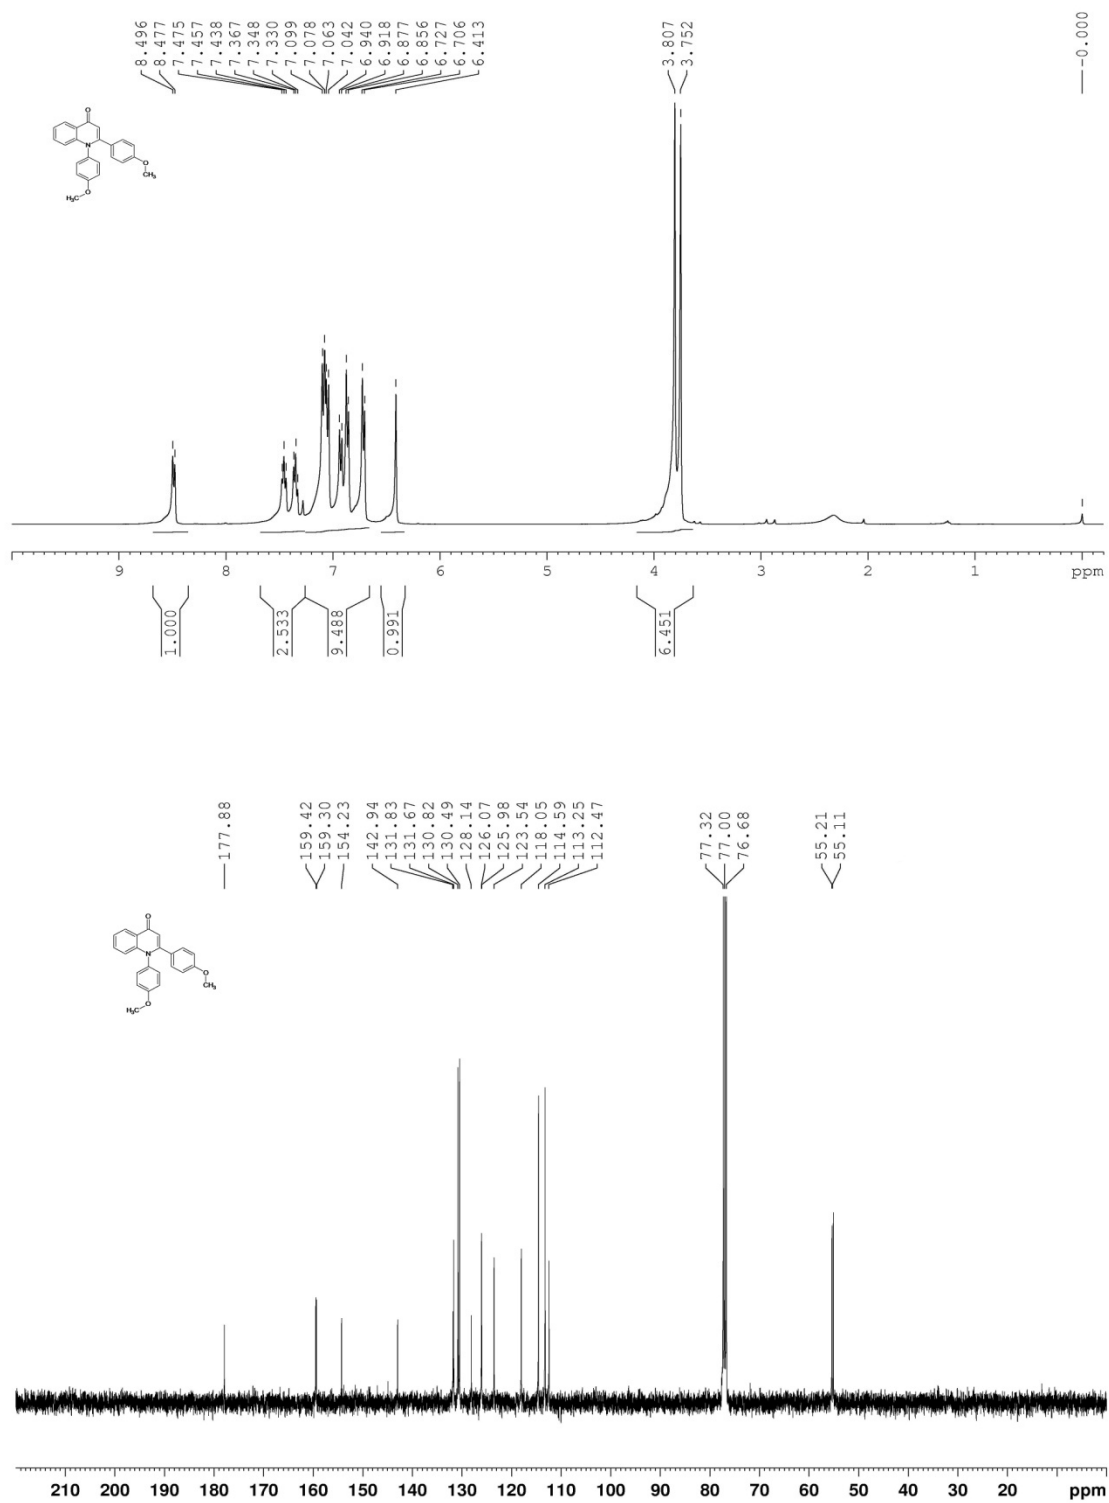

Figure S11. <sup>1</sup>H and <sup>13</sup>C NMR spectra of compound **4i**

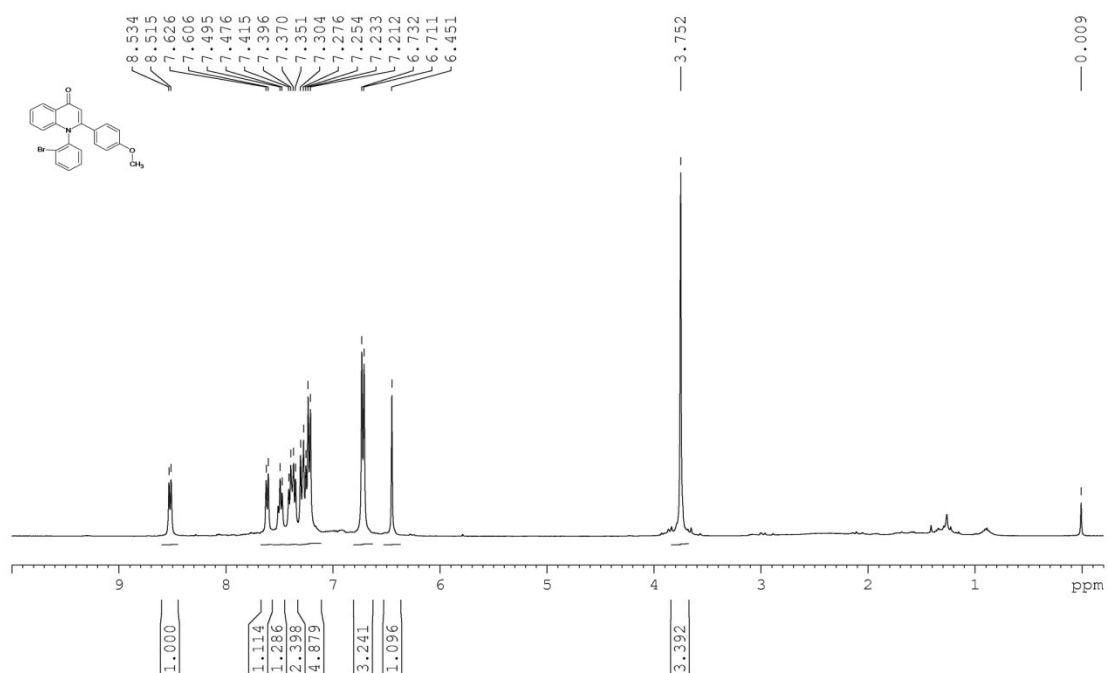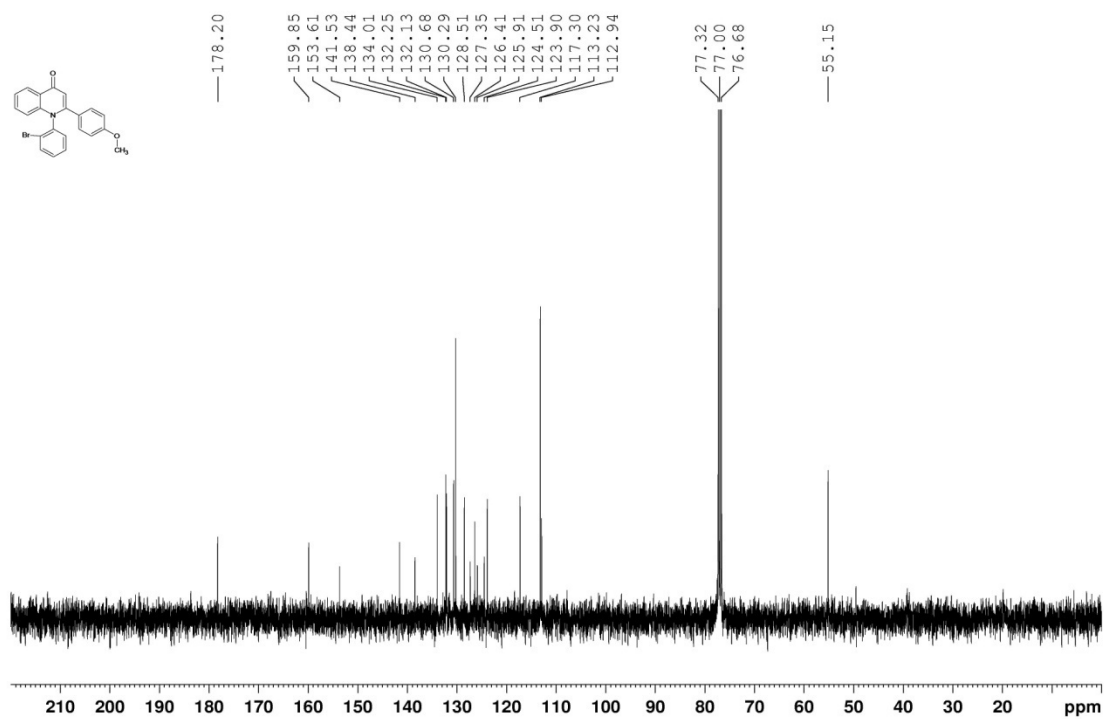

Figure S12. <sup>1</sup>H and <sup>13</sup>C NMR spectra of compound 4j

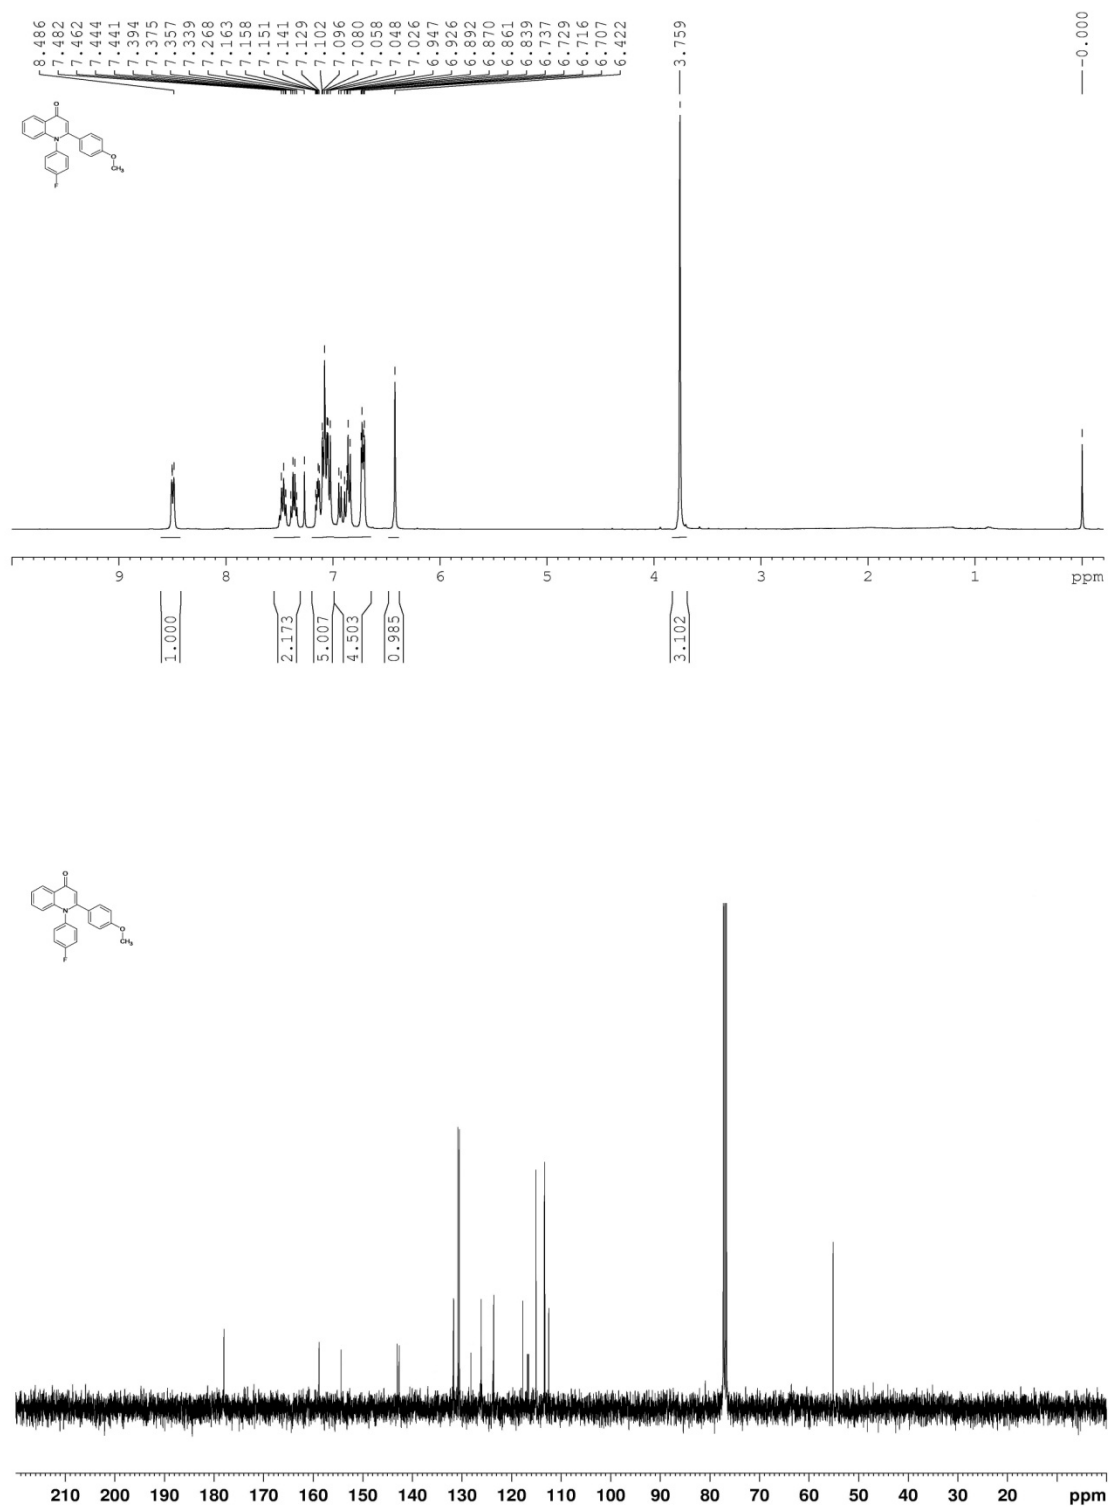

**Figure S13.** <sup>1</sup>H and <sup>13</sup>C NMR spectrum of compound **4k**

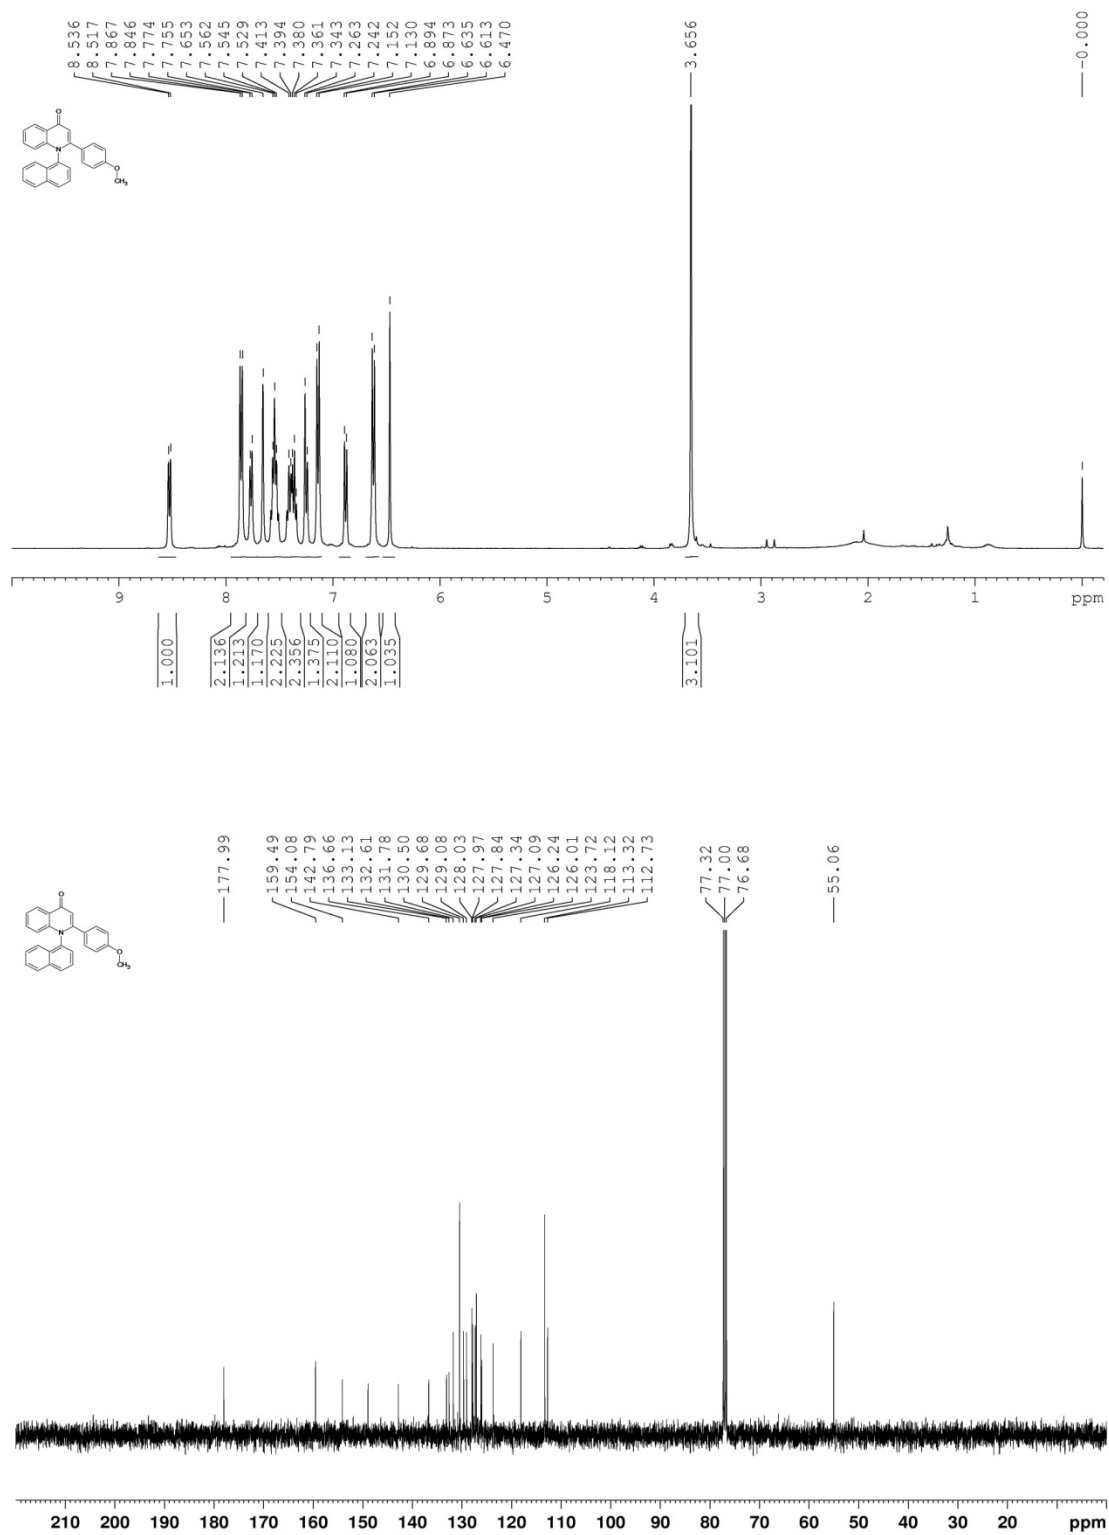

Figure S14. <sup>1</sup>H and <sup>13</sup>C NMR spectra of compound 4l

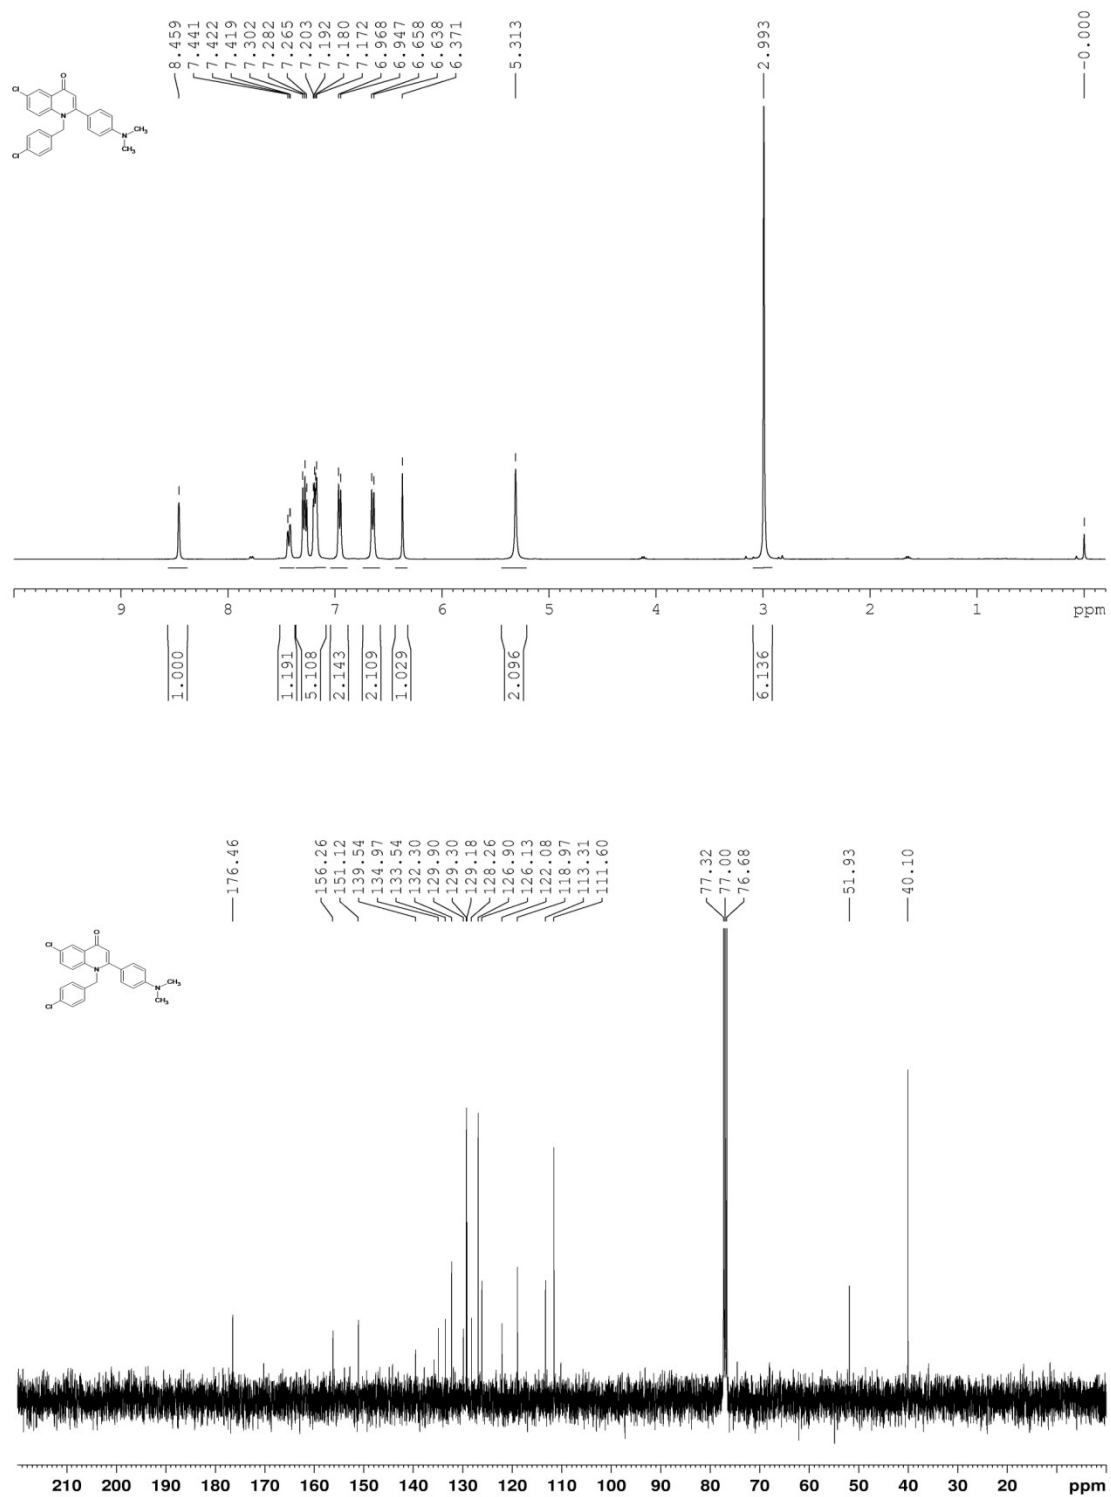

**Figure S15.** <sup>1</sup>H and <sup>13</sup>C spectra of compound **4m**



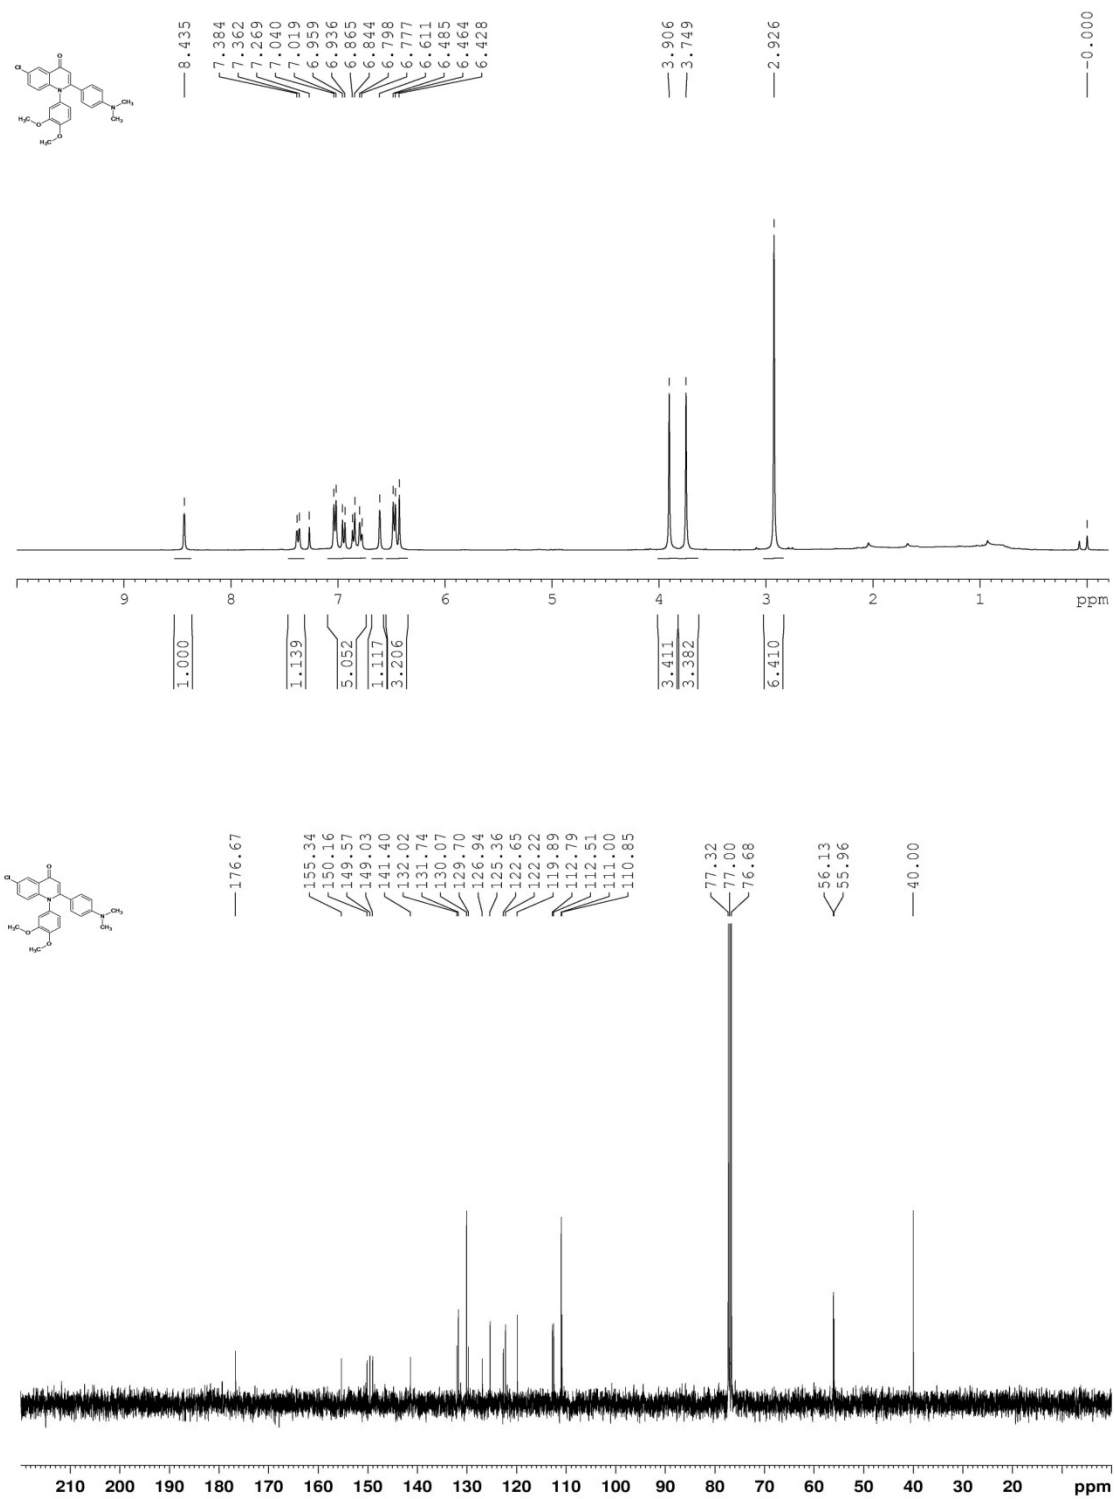

**Figure S16.** <sup>1</sup>H and <sup>13</sup>C NMR spectra of compound **4n**

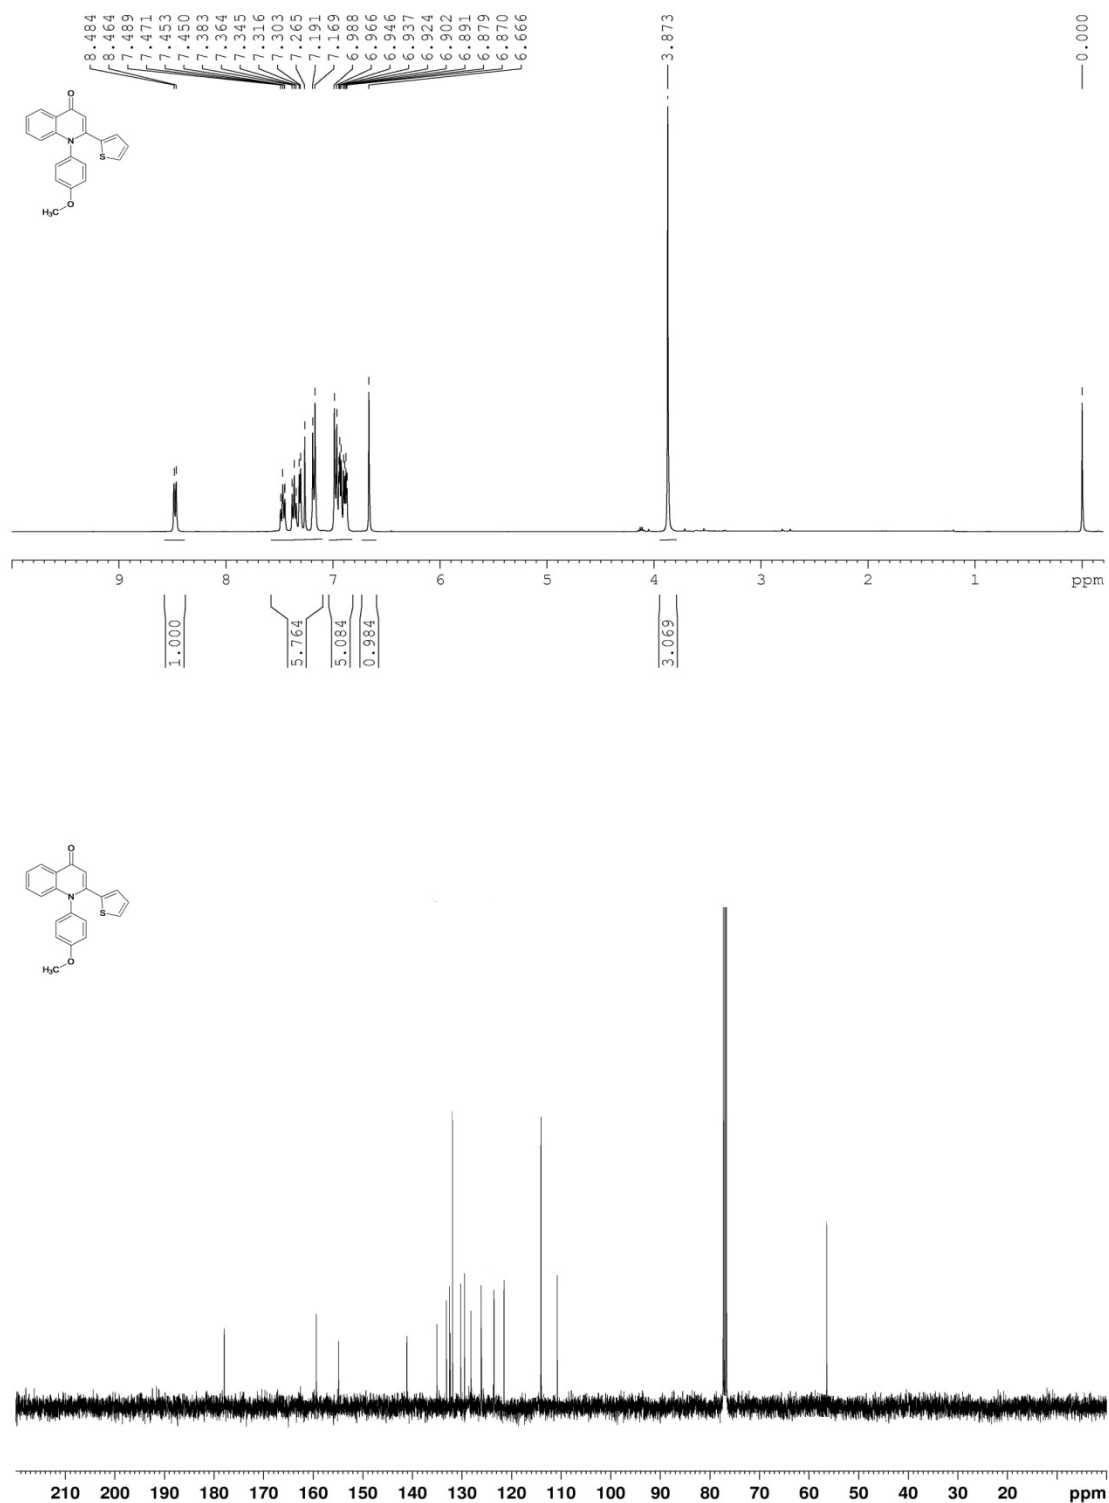

**Figure S17.** <sup>1</sup>H and <sup>13</sup>C NMR spectra of compound **40**
